# Supplementary material for: Alloying strategy for developing a single-band warm white emitting material Cs2NaGdCl6:Bi3+via Ag+ co-doping
Source: Royal Society of Chemistry journal article supplement (doi:10.1039/d4tc00605d), 2024-01-01
Supplement: d4tc00605d1.pdf [file d4tc00605d1.pdf]

## Supporting Information

### Alloying Strategy for Developing a Single-Band Warm White Emitting Material $\text{Cs}_2\text{NaGdCl}_6:\text{Bi}^{3+}$ via $\text{Ag}^+$ Co-Doping

*Qianrong Jin, Jinrong Shi, Jianwei Jin, Wenli Xu, Suqin Chen, Yuexiao Pan\**

*Key Laboratory of Carbon Materials of Zhejiang Province, College of Chemistry and  
Materials Engineering, Wenzhou University, Wenzhou 325035, P.R. China.*

*E-mail: [yxpan@wzu.com](mailto:yxpan@wzu.com)*

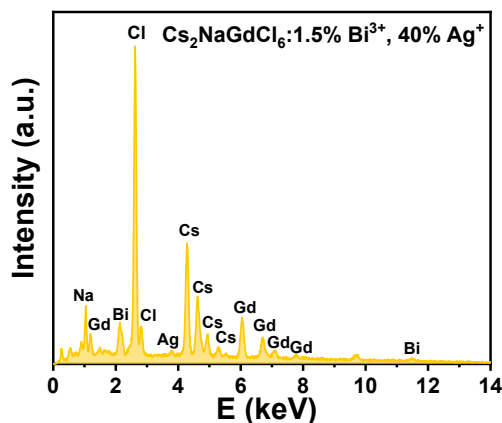

**Fig. S1** X-ray energy dispersive spectroscopy (EDS) spectrum of  $\text{CNAGC}:\text{Bi}^{3+}$  measured by EDS using a JEOL 2100F high-resolution transmission electron microscope equipped with an energy-dispersive X-ray detector, operating at an accelerating voltage of 200 kV.

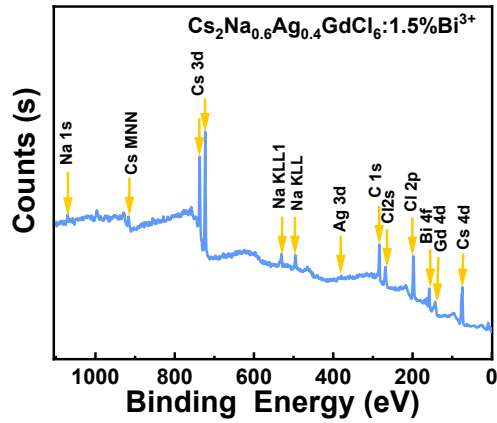

**Fig. S2** XPS full spectrum of CNAGC:Bi<sup>3+</sup>.

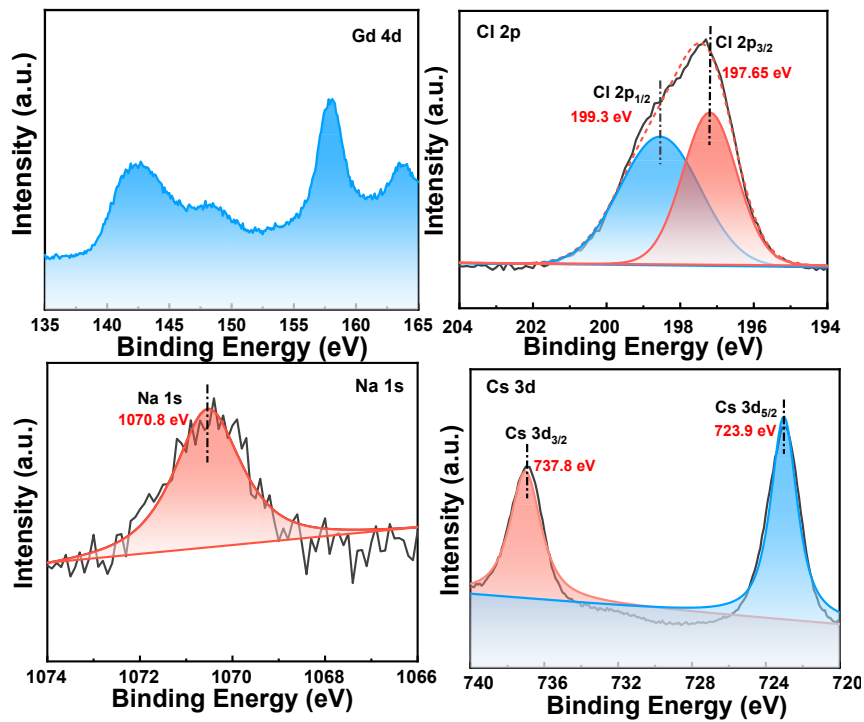

**Fig. S3** High-resolution XPS full spectra of Gd 4d, Cl 2p, Cs 3d, and Na 1s for CNAGC:Bi<sup>3+</sup>.

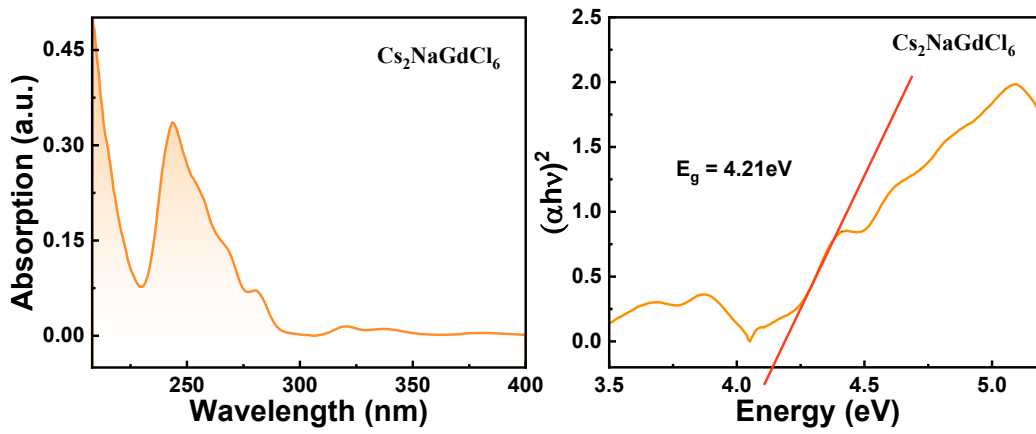

Fig. S4 The UV-vis absorption and bandgap of primitive CNGC host matrix.

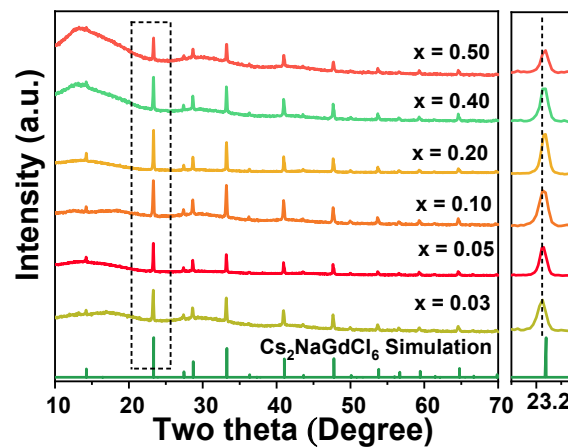

Fig. S5 The XRD patterns of  $\text{Cs}_2\text{Na}_{1-x}\text{Ag}_x\text{GdCl}_6$  with various  $\text{Ag}^+$  ions concentrations.

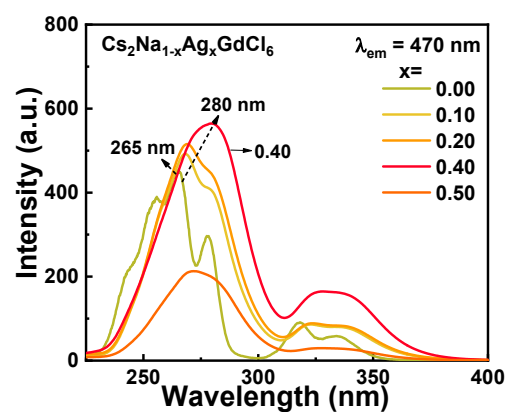

Fig. S6 PLE spectra of  $\text{Cs}_2\text{Na}_{1-x}\text{Ag}_x\text{GdCl}_6$  with various  $x$  values.

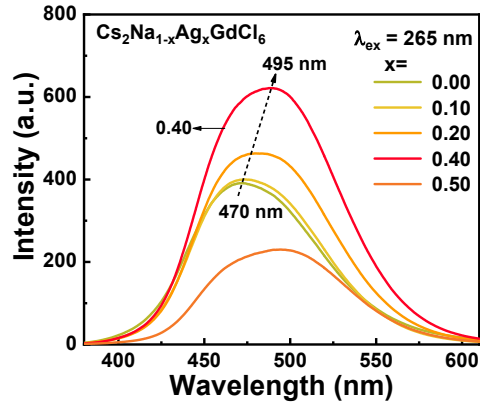

Fig. S7 PL spectra of  $\text{Cs}_2\text{Na}_{1-x}\text{Ag}_x\text{GdCl}_6$  with various  $x$  values.

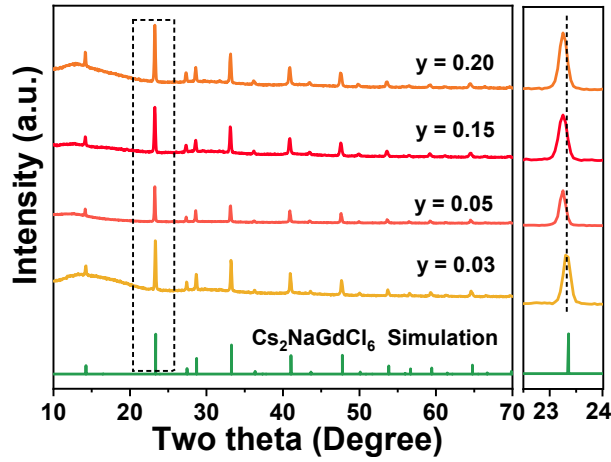

Fig. S8 The XRD patterns of  $\text{Cs}_2\text{NaGd}_{1-y}\text{Bi}_y\text{Cl}_6$  with various  $\text{Bi}^{3+}$  ions concentrations.

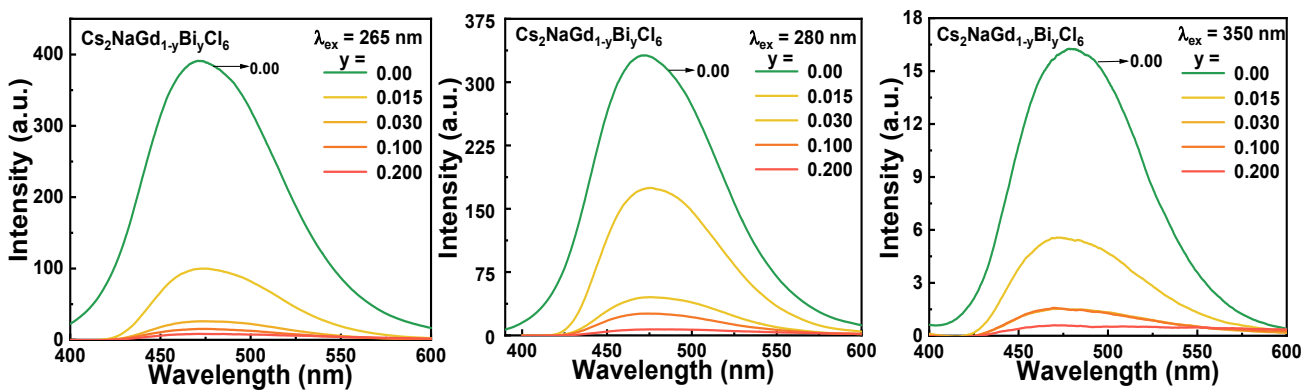

Fig. S9 PL spectra of  $\text{Cs}_2\text{NaGd}_{1-y}\text{Bi}_y\text{Cl}_6$  changes with different  $y$  values under different excitation.

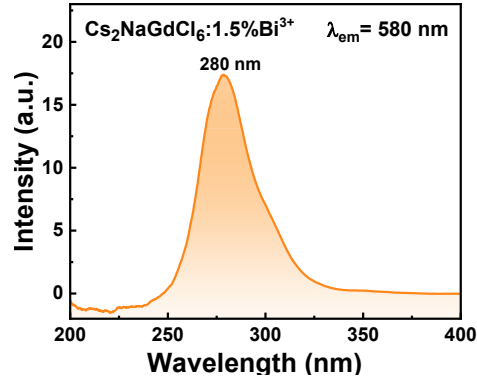

**Fig. S10** PLE spectrum of CNGC:Bi<sup>3+</sup>.

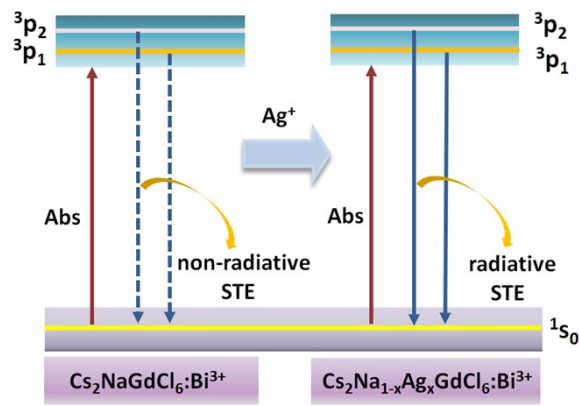

**Fig. S11** The PL mechanism of Ag<sup>+</sup>-doped CNGC:Bi<sup>3+</sup>.

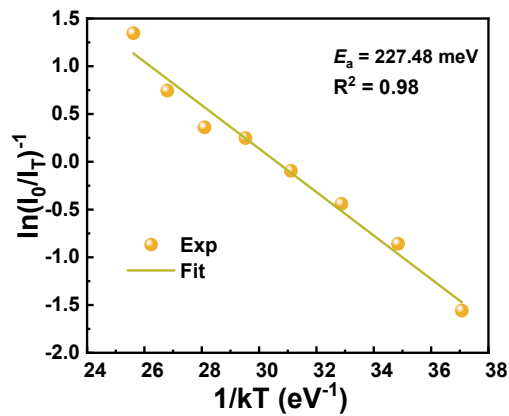

**Fig. S12** The relationship between  $\ln(I_0/I_T)^{-1}$  and  $1/kT$  of CNGC:Bi<sup>3+</sup>.

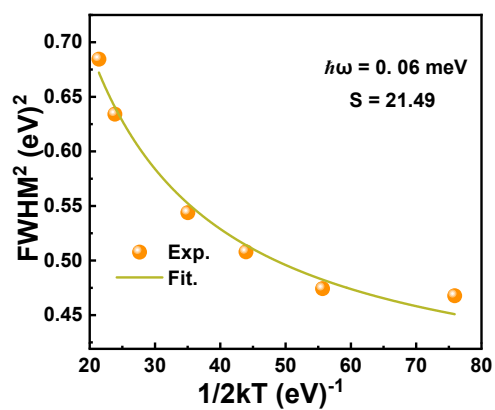

**Fig. S13** The FWHM as a function of temperature for CNGC:Bi<sup>3+</sup>.

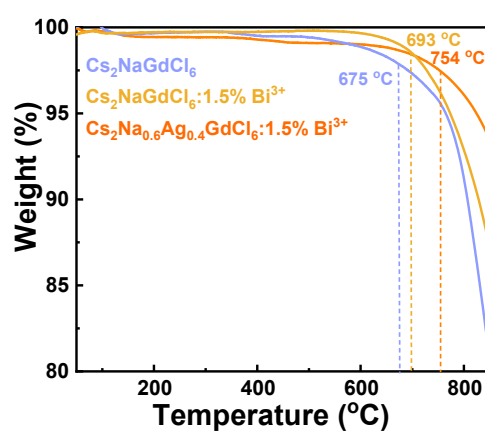

**Fig. S14** Thermal gravimetric analysis (TGA) curves measured from room temperature to 900 °C at the heating rate of 10 °C min<sup>-1</sup> on a synchronous thermal analyzer (TGA/DSC, Mettler, Switzerland).
